# Supplementary material for: Comparative Pollen Morphology of Selected Species of Blumea DC. and Cyathocline Cass. and Its Taxonomic Significance
Source: MDPI journal article supplement (doi:10.3390/plants12162909), 2023-08-09
Supplement: s1 [file s1]

**Table S1. Summary showing the pollen grains dimensions (LM) in *Blumea* and *Cyathocline*.**

| Species                     | P (μm) (Meant±SD, range)    | E (μm) (Meant±SD, range)    | P/E (Meant±SD, range)     | P*E (Meant±SD, range)           | Polar grain shape         |
|-----------------------------|-----------------------------|-----------------------------|---------------------------|---------------------------------|---------------------------|
| <i>Blumea aromatica</i>     | 20.81±1.44<br>(18.59–23.66) | 21.41±1.46<br>(18.59–23.31) | 0.97±0.05<br>(0.91–1.09)  | 329.55±56.83<br>(356.17–545.91) | Spherical                 |
| <i>Blumea balsamifera</i>   | 16.70±0.91<br>(14.65–18.59) | 15.91±1.19<br>(14.09–19.16) | 1.05±0.06<br>(0.90–1.12)  | 231.50±32.28<br>(222.22–356.13) | Spherical, few triangular |
| <i>Blumea clarkei</i>       | 17.43±0.89<br>(14.65–18.59) | 17.15±1.24<br>(13.75–19.12) | 1.0±0.06<br>(0.89–1.20)   | 299.60±33.08<br>(227.26–356.19) | Spherical                 |
| <i>Blumea densiflora</i>    | 18.24±1.12<br>(16.34–20.2)  | 18.09±1.19<br>(16.33–20.00) | 1.01±0.05<br>(0.93–1.08)  | 300.83±39.13<br>(266.85–405.64) | Spherical, triangular     |
| <i>Blumea duclouxii</i>     | 16.03±1.87<br>(12.53–19.43) | 14.47±1.85<br>(11.50–18.29) | 1.11±0.15<br>(0.89–1.39)  | 232.00±46.6<br>(180.37–323.69)  | Spherical, few triangular |
| <i>Blumea eberhardtii</i>   | 17.67±1.08<br>(16.06–19.12) | 17.53±1.05<br>(15.94–19.44) | 1.01±0.05 (0.87–1.11)     | 310.37±33.33<br>(260.27–366.83) | Spherical                 |
| <i>Blumea fistulosa</i>     | 17.09±0.94<br>(15.21–18.87) | 15.94±1.24<br>(14.65–18.59) | 1.08±0.07 (0.95–1.17)     | 237.33±32.12<br>(222.81–350.89) | Spherical                 |
| <i>Blumea hieraciifolia</i> | 18.38±1.10<br>(17.18–20.85) | 17.28±1.54<br>(14.65–20.85) | 1.07±-0.06<br>(0.98–1.21) | 289.90±46.79<br>(260.00–434.51) | Spherical                 |
| <i>Blumea hookeri</i>       | 19.87±1.41<br>(16.73–22.82) | 18.74±1.21<br>(16.74–21.11) | 1.06±0.04<br>(1.00–1.16)  | 373.64±48.25<br>(280.03–466.83) | Spherical                 |
| <i>Blumea lacera</i>        | 19.72±1.13<br>(17.53–21.13) | 19.03±1.02<br>(16.90–21.1)  | 1.04±0.05<br>(0.96–1.16)  | 326.97±37.19<br>(290.41–440.39) | Spherical                 |
| <i>Blumea martiniana</i>    | 21.37±0.94<br>(19.72–22.82) | 20.13±1.05<br>(18.27–22.31) | 1.06±0.06<br>(0.95–1.13)  | 430.33±32.00<br>(366.60–488.79) | Spherical                 |
| <i>Blumea megacephala</i>   | 21.71±1.10<br>(19.16–23.66) | 20.77±1.22<br>(18.72–22.25) | 1.05±0.04 (0.99–1.17)     | 451.79±45.63<br>(361.51–514.18) | Spherical                 |
| <i>Blumea napifolia</i>     | 23.69±1.38                  | 23.09±1.30                  | 1.03±0.03                 | 476.85±60.57                    | Spherical                 |

|                                 |                               |                               |                            |                                   |                           |
|---------------------------------|-------------------------------|-------------------------------|----------------------------|-----------------------------------|---------------------------|
|                                 | (21.13–25.92)                 | (21.11–25.07)                 | (0.99 –1.08 )              | (441.60–664.31)                   |                           |
| <i>Blumea riparia</i>           | 18.42±0.83<br>(16.53–19.62)   | 17.84±1.43<br>(15.74–20.56)   | 1.04 -0.08<br>(0.86–1.14)  | 328.97±33.93<br>(276.65–393.88)   | Spherical                 |
| <i>Blumea repanda</i>           | 20.00±1.40<br>(16.93–22.25)   | 20.06±1.25<br>(17.47–21.69)   | 1.00±0.05<br>(0.89–1.07)   | 350.00±48.84<br>(295.23–482.81 )  | Spherical                 |
| <i>Blumea sessiliflora</i>      | 17.63±1.05<br>(15.49–19.44)   | 16.75±1.28<br>(13.15–18.31)   | 1.06±0.05<br>(0.98–1.18 )  | 257.71±37.43<br>(204.24–330.09)   | Spherical                 |
| <i>Blumea sinuata</i>           | 22.27±1.30<br>(19.72 –24.30 ) | 21.91±1.58<br>(19.52–23.90)   | 1.02±0.05<br>(0.93–1.10)   | 425.75±60.67<br>(408.50–609.88)   | Spherical                 |
| <i>Blumea paniculata</i>        | 18.32±1.10<br>(16.90–21.13)   | 17.84±0.97<br>(16.73–20.56)   | 1.03±0.04<br>(0.94–1.14)   | 297.86±36.30<br>(283.31–434.43)   | Spherical, few triangular |
| <i>Blumea virens</i>            | 20.43±1.41<br>(18.03–22.82)   | 19.66±1.40<br>(17.18–21.41)   | 1.04±0.06<br>(0.96–1.17)   | 403.15±52.43<br>(350.41–476.57)   | Spherical                 |
| <i>Cyathocline<br/>purpurea</i> | 15.64±0.80<br>(14.14 – 17.13) | 15.07±0.97<br>(13.15 – 16.33) | 1.04±0.04<br>(0.96 – 1.11) | 236.24±25.72<br>(185.94 – 279.78) | Spherical                 |

Note: All the data are measured in LM (400×), P=Polar axis, E=Equatorial diameter.

**Table S2. Pollen characters for the species examined in this study by SEM (only great variable characters are shown).**

| Species                            | Number of aperture | Spine's length (μm)<br>(Mean, range) | Spines number<br>(Mean, range) | The apices of spines | Interspinular microperforations | Pollen grain shape        |
|------------------------------------|--------------------|--------------------------------------|--------------------------------|----------------------|---------------------------------|---------------------------|
| <i>Blumea aromatica</i>            | 3                  | 4.15 (3.61–4.86)                     | 31 (29–32)                     | blunt                | dense                           | spherical                 |
| <i>Blumea balsamifera</i>          | 3                  | 3.29 (2.71–4.18)                     | 34 (31–37)                     | blunt                | sparse                          | spherical                 |
| <i>Blumea clarkei</i>              | 3                  | 4.25 (3.83–4.70)                     | 34 (30–37)                     | acute                | dense                           | spherical                 |
| <i>Blumea densiflora</i>           | 3                  | 2.78 (2.09–3.43)                     | 27 (20–32)                     | acute                | dense                           | triangular, spherical     |
| <i>Blumea duclouxii</i>            | 3                  | 3.37 (3.0–3.4)                       | 39 (33–43)                     | acute                | dense                           | spherical, few triangular |
| <i>Blumea eberhardtii</i>          | 3                  | 4.23 (4.05–4.57)                     | 29 (28–30)                     | acute                | sparse                          | spherical                 |
| <i>Blumea fistulosa</i>            | 3                  | 4.85 (4.22–5.39)                     | 44 (41–49)                     | blunt                | dense                           | spherical                 |
| <i><u>Blumea hieraciifolia</u></i> | 3                  | 3.79 (3.39–4.19)                     | 34 (25–42)                     | blunt                | dense                           | spherical                 |
| <i>Blumea hookeri</i>              | 3                  | 4.38 (4.20–4.61)                     | 29 (26–30)                     | blunt                | dense                           | spherical                 |
| <i>Blumea lacera</i>               | 3                  | 4.46 (3.47–5.5)                      | 33 (29–37)                     | acute                | sparse                          | spherical                 |
| <i>Blumea martiniana</i>           | 3                  | 3.75 (3.22–4.46)                     | 32 (28–40)                     | blunt                | dense                           | spherical                 |
| <i>Blumea megacephala</i>          | 3                  | 4.25 (3.68–5.22)                     | 29 (26–30)                     | blunt                | dense                           | spherical                 |
| <i>Blumea napifolia</i>            | 3                  | 4.72 (3.57–5.30)                     | 44 (39–58)                     | blunt                | sparse                          | spherical                 |
| <i>Blumea riparia</i>              | 3                  | 3.93 (3.21–4.35)                     | 26 (23–35)                     | blunt                | dense                           | spherical                 |
| <i>Blumea repanda</i>              | 3                  | 4.52 (4.03–5.75)                     | 33 (31–36)                     | acute                | sparse                          | spherical                 |
| <i>Blumea sessiliflora</i>         | 3                  | 3.20 (2.51–3.48)                     | 34 (28–37)                     | blunt                | sparse                          | spherical                 |
| <i>Blumea sinuata</i>              | 3                  | 5.23 (4.47–6.13)                     | 67 (62–79)                     | acute                | dense                           | spherical                 |
| <i>Blumea paniculata</i>           | 3                  | 3.91 (3.33–4.41)                     | 40 (35–44)                     | blunt                | dense                           | spherical                 |
| <i>Blumea virens</i>               | 3                  | 4.07 (3.60–4.64)                     | 33 (30–36)                     | blunt                | dense                           | spherical                 |
| <i>Cyathocline purpurea</i>        | 3                  | 4.23 (3.46–4.56)                     | 24 (21–28)                     | acute                | dense                           | spherical                 |

Note: All the values calculated based on the measured mean value magnified by 8400 times.
